# Supplementary material for: Potential application of a defective NiCl2 monolayer as a toxic gas sensor: a computational study
Source: Royal Society of Chemistry journal article supplement (doi:10.1039/d4nj02560a), 2024-01-01
Supplement: d4nj02560a1.pdf [file d4nj02560a1.pdf]

## Supporting Information

### Potential Applications of Defective NiCl<sub>2</sub> Monolayer as Toxic Gas Sensors: A Computational Study

Lei Chen, Zhongxu Wang,\* Jingxiang Zhao\*

Key Laboratory for Photonic and Electronic Bandgap Materials, Ministry of  
Education, School of Physics and Electronic Engineering, Harbin Normal University,  
Harbin, 150025, P. R. China.

*\*To whom correspondence should be addressed. Email: [wzx\\_azsecho@163.com](mailto:wzx_azsecho@163.com);*

*[zhaojingxiang@hrbnu.edu.cn](mailto:zhaojingxiang@hrbnu.edu.cn) (J. Zhao)*

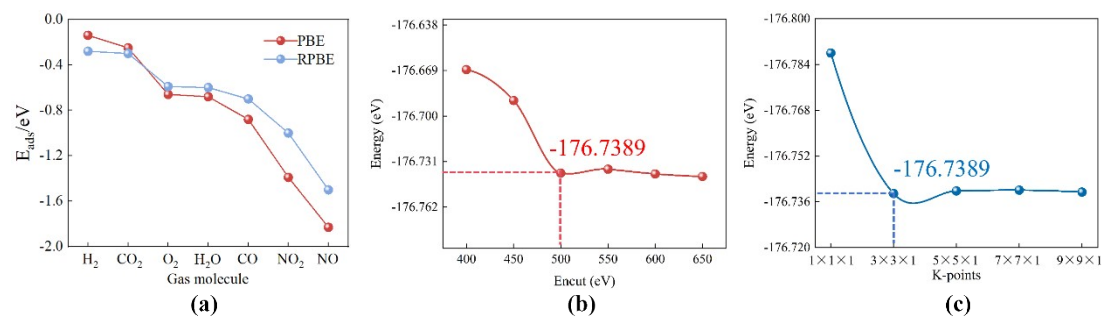

**Fig. S1.** Adsorption energies calculated by PBE and RPBE functionals (a), computed total energies of VCl-NiCl<sub>2</sub> by considering different cutoff energy (b) and K-points (c) and the adopted energies in the present work.

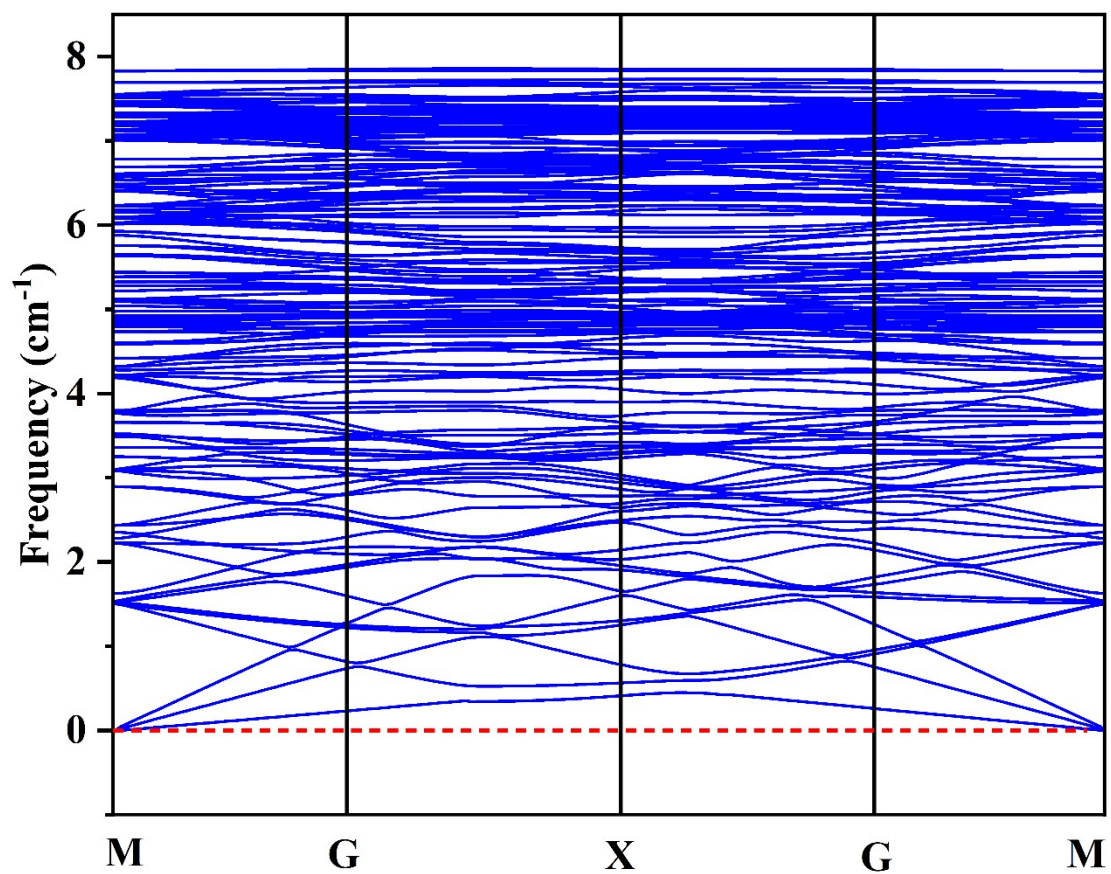

**Fig. S2.** The computed phonon dispersions of  $V_{Cl}$ - $NiCl_2$  monolayer.

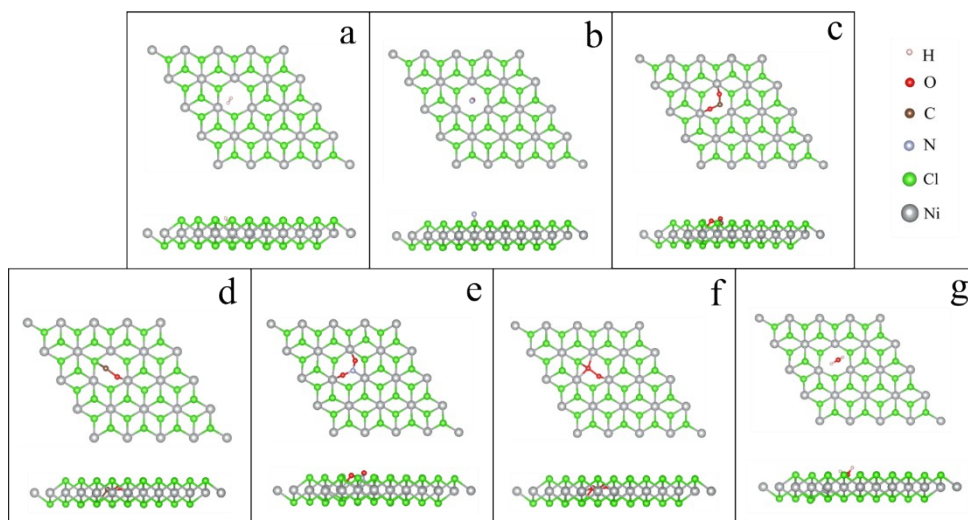

**Fig. S3.** Optimized suitable structures for (a)  $H_2$ , (b)  $NO$ , (c)  $CO_2$ , (d)  $CO$ , (e)  $NO_2$ , (f)  $O_2$ , and (g)  $H_2O$  adsorbed on  $V_{Cl}$ - $NiCl_2$  monolayer.

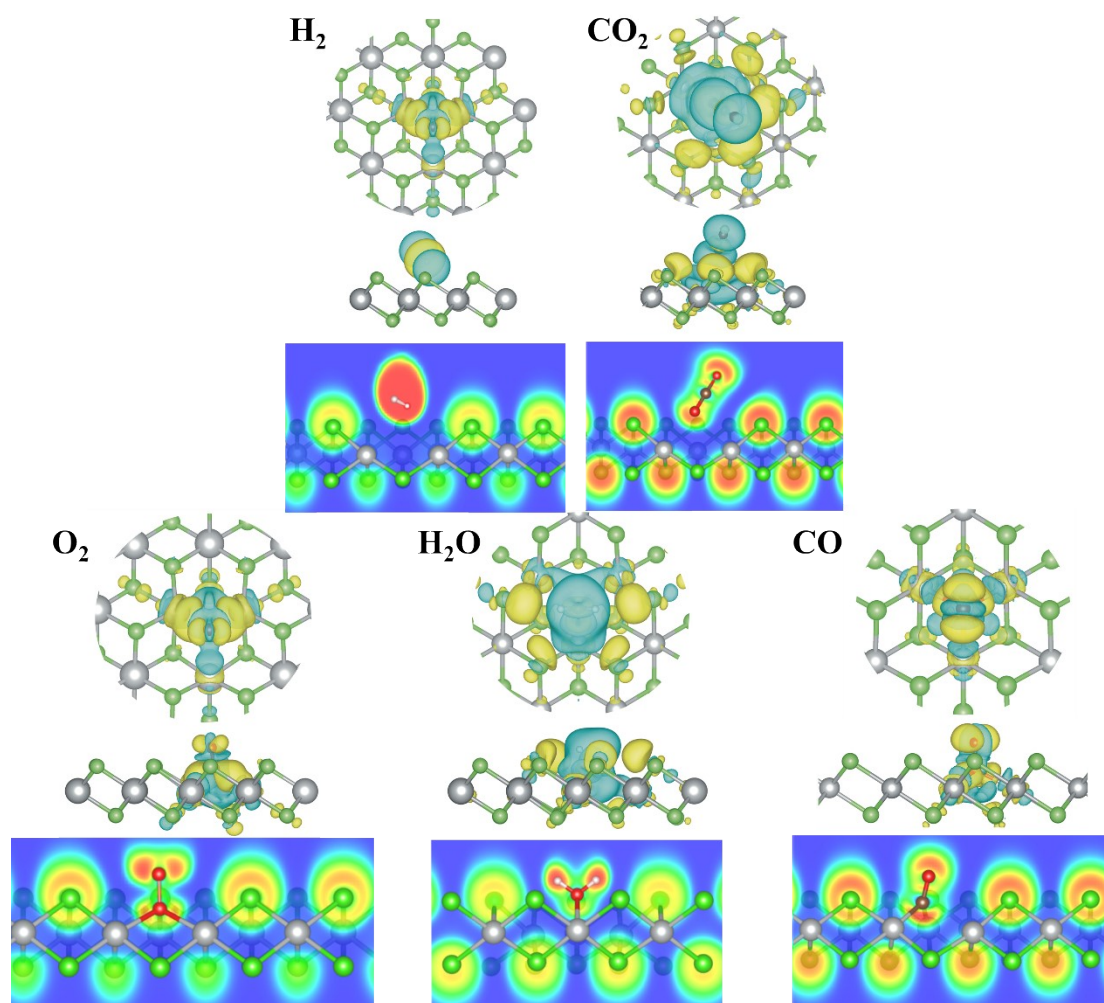

**Fig. S4** Difference charge density and ELF maps of small molecules adsorbed on  $V_{Cl}$ - $NiCl_2$ , the iso-surface value is  $0.02 e \text{ \AA}^{-3}$ . The charge accumulation and disruption regions are shown in yellow and cyan, respectively.

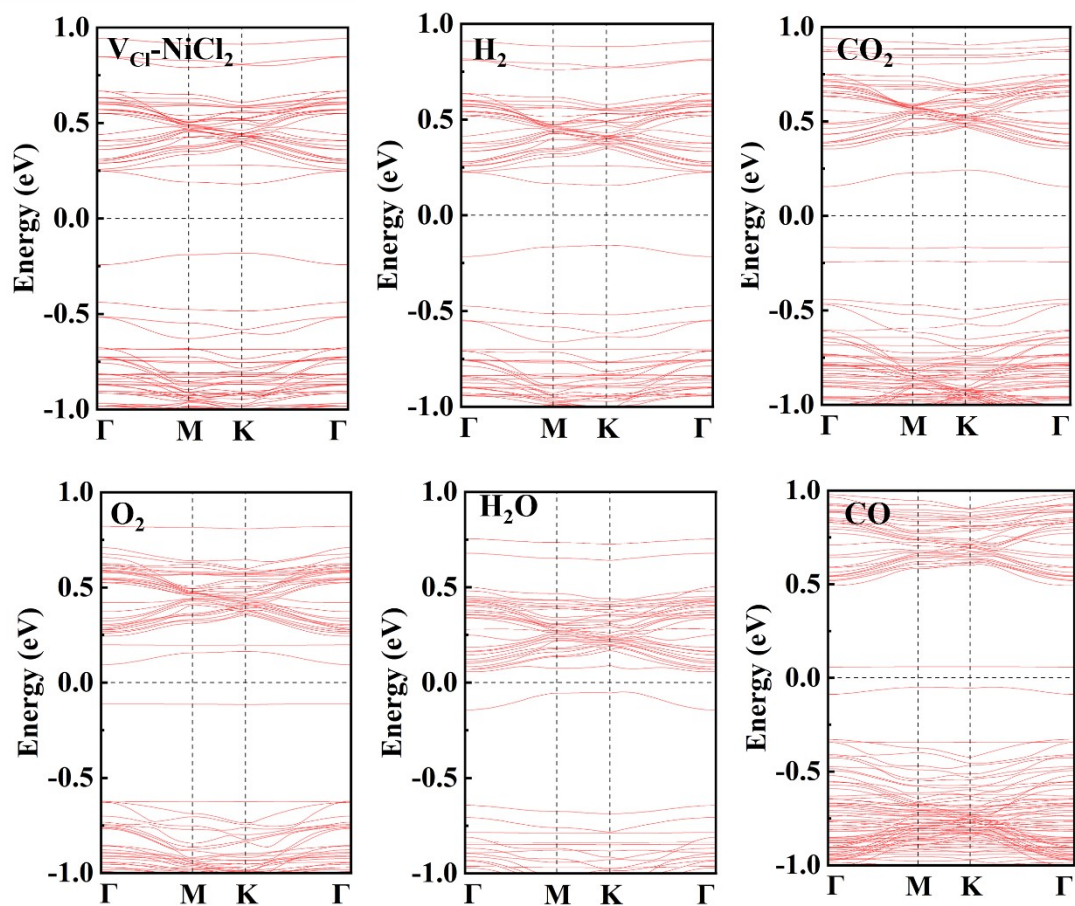

**Fig. S5** Computed band structures of  $V_{Cl}-NiCl_2$  monolayer,  $H_2$ ,  $CO_2$ ,  $O_2$ ,  $H_2O$  and  $CO$  adsorbed on  $V_{Cl}-NiCl_2$  monolayer.

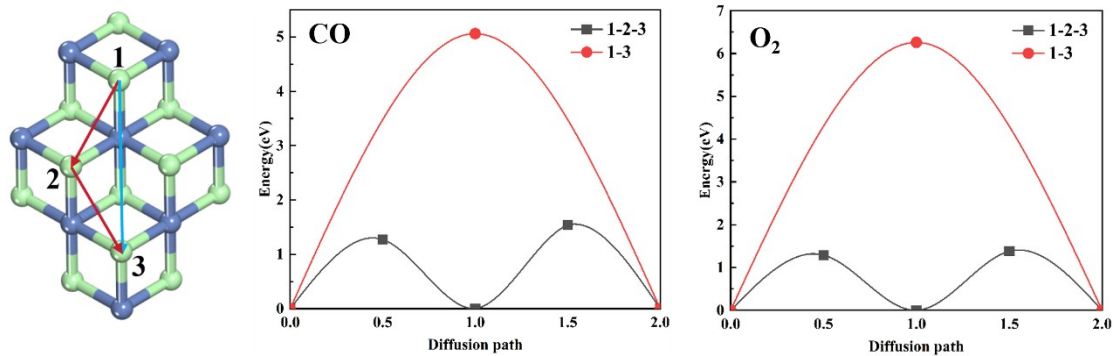

**Fig. S6** (a) The selected adsorption sites and diffusion paths, and diffusion barriers of CO and O<sub>2</sub>.

Cartesian coordination information of  $V_{Cl-NiCl_2}$ .

defective  $NiCl_2$

1.0

|               |               |               |
|---------------|---------------|---------------|
| 13.9425001144 | 0.0000000000  | 0.0000000000  |
| -6.9715024842 | 12.0744135491 | 0.0000000000  |
| 0.0029667614  | -0.0017128192 | 19.9999997066 |

|    |    |
|----|----|
| Cl | Ni |
| 31 | 16 |

Cartesian

|              |              |             |
|--------------|--------------|-------------|
| 1.742889846  | 1.008398204  | 6.302599814 |
| 0.006710366  | 2.026615239  | 3.696399873 |
| 5.227190164  | 1.005138183  | 6.302599814 |
| 3.480414655  | 2.026253072  | 3.696199899 |
| 8.714349342  | 1.002240171  | 6.303599980 |
| 6.970152301  | 2.010436120  | 3.689199930 |
| 12.201716360 | 1.005017468  | 6.301399973 |
| 10.459401772 | 2.010919101  | 3.688400036 |
| 0.011585197  | 4.071194221  | 6.301599649 |
| -1.798844571 | 4.997771316  | 3.638199812 |
| 3.474832820  | 4.070831890  | 6.301199701 |
| 1.743332162  | 5.093269998  | 3.751800005 |
| 6.969452103  | 4.025794202  | 6.302800086 |
| 5.285897302  | 4.997771316  | 3.638199812 |
| 10.460374893 | 4.026518503  | 6.303599980 |
| 8.715131822  | 5.032903349  | 3.689199930 |
| -1.695875328 | 7.028459789  | 6.301399973 |
| -3.469908222 | 8.047038620  | 3.696599846 |
| 0.054624980  | 8.018055495  | 3.752199952 |
| 5.183145488  | 7.029304724  | 6.301199701 |
| 3.431568965  | 8.018175683  | 3.752199952 |
| 8.714223175  | 7.045001068  | 6.302599814 |
| 6.956432944  | 8.047279733  | 3.696399873 |
| -3.481693723 | 10.059620279 | 6.302199867 |
| -5.227634366 | 11.067695611 | 3.684399968 |
| 0.036417723  | 10.028709613 | 6.301399973 |
| -1.732735598 | 11.055741216 | 3.696599846 |
| 3.451075451  | 10.028709613 | 6.301399973 |
| 1.743467677  | 11.133143224 | 3.638400084 |
| 6.969116279  | 10.060706978 | 6.302599814 |
| 5.219762041  | 11.055378526 | 3.696199899 |
| 13.941707052 | 0.000538553  | 4.990599976 |
| 3.487689813  | 0.000417809  | 4.990599976 |
| 0.006343673  | 12.073261489 | 4.989799784 |
| 3.480117237  | 12.073503322 | 4.989599810 |
| -1.744784657 | 3.023730289  | 4.989599810 |
| 1.743284057  | 3.030610401  | 5.016400144 |
| 5.231345181  | 3.023730289  | 4.989599810 |
| 8.714948814  | 3.018055413  | 4.988799916 |



|              |             |             |
|--------------|-------------|-------------|
| -3.481455676 | 6.032070504 | 4.989799784 |
| -0.058094393 | 6.002494435 | 4.914199936 |
| 3.544786527  | 6.002736251 | 4.914199936 |
| 6.968168880  | 6.032070521 | 4.989599810 |
| 8.714544188  | 9.053813116 | 4.990599976 |
| -1.730964187 | 9.048860151 | 5.016400144 |
| 1.743768750  | 9.123247542 | 4.914199936 |
| 5.218186490  | 9.049222875 | 5.016400144 |
